# Supplementary material for: The cell envelope of Staphylococcus aureus selectively controls the sorting of virulence factors
Source: PubMed Central journal article supplement (PMC8548510; doi:10.1038/s41467-021-26517-z), 2021-10-26
Supplement: 41467_2021_26517_MOESM3_ESM.pdf [file 41467_2021_26517_MOESM3_ESM.pdf]

## **Description of Additional Supplementary Files**

File Name: Supplementary Data 1

Description: Screen data.

File Name: Supplementary Data 2

Description: Surface proteomics.

File Name: Supplementary Data 3

Description: Bacterial strains, plasmids, and primers.
